# Supplementary material for: The Genetic Basis of Pericentral Retinitis Pigmentosa—A Form of Mild Retinitis Pigmentosa
Source: Genes (Basel). 2017 Oct 5;8(10):256. doi: 10.3390/genes8100256 (PMC5664106; doi:10.3390/genes8100256)
Supplement: Supplementary file 1 [file genes-08-00256-s001.xlsx]

## Sheet: Sup Table 1 - genotypes w anno
Solved by panel-based sequencing
Family#	ID	Gene	Protein variant	Variant description, genomic coordinates	Variant description, HGVS format	Type	Pedigree type	Sanger / correct segregation	ExAC AF	gerpRS	SIFT	Polyphen	Notes		Reference link	Human Gene Mutation Database (HGMD)	ClinVar Database
1	003-292	PDE6B	p.(Cys458Tyr)	NC_000004.11:g.651255G>A	NM_000283.3:c.1373G>A	HET	recessive	proband	8.32e-06	4.71	DAMAGING	D				-	-
1	003-292	PDE6B	p.(Lys518Ile)	NC_000004.11:g.654341A>T	NM_000283.3:c.1553A>T	HET	recessive	proband	1.665e-05	4.25	DAMAGING	P				-	-
4	043-010	RHO	p.(Gly101Val)	NC_000003.11:g.129247878G>T	NM_000539.3:c.302G>T	HET	isolate		0	4.43	DAMAGING	D				-	-
5	043-011	PDE6B	p.(Gln298*)	NC_000004.11:g.647908C>T	NM_000283.3:c.892C>T	HET	recessive	proband	4.157e-05	5.1	DAMAGING	NA		8394174	pubmed 8394174	Retinitis pigmentosa;DM;CM930580;PMID:	MedGen:C3151107,OMIM:613801;Pathogenic;RCV000013982
5	043-011	PDE6B	p.(Arg100His)	NC_000004.11:g.619714G>A	NM_000283.3:c.299G>A	HET	recessive	proband	0.00010912	4.98	DAMAGING	D		22334370	pubmed 22334370	Retinitis pigmentosa;DM;CM124869;PMID:	-
6	043-012	CNGA1	p.(Thr586Serfs*17)	NC_000004.11:g.47938753_47938756delAGTT	NM_000087.3:c.1755 _1758delAACT	HET	unknown-adopted	proband	8.28e-06	4.77	-	-				-	-
6	043-012	CNGA1	p.(Ser320Phe)	NC_000004.11:g.47939552G>A	NM_000087.3:c.959C>T	HET	unknown-adopted	proband	0.0010272	4.77	DAMAGING	B		7479749	pubmed 7479749	Retinitis pigmentosa;DM;CM950277;PMID:	MedGen:C3151059,OMIM:613756;Pathogenic;RCV000018440;RCV000199453
7	043-013	RHO	p.(Gly18Asp)	NC_000003.11:g.129247629G>A	NM_000539.3:c.53G>A	HET	isolate	proband	3.298e-05	5.52	TOLERATED	D				-	-
8	043-014	RHO	p.(Thr58Arg)	NC_000003.11:g.129247749C>G	NM_000539.3:c.173C>G	HET	dominant	proband	0	5.52	DAMAGING	D		2215617	pubmed 2215617	Retinitis pigmentosa;DM;CM900198;PMID:	MedGen:C3151001,OMIM:613731;Pathogenic;RCV000013890
12	043-019	USH2A	p.(Glu3448Lys)	NC_000001.10:g.215960057C>T	NM_206933.2:c.10342G>A	HOM	recessive	proband, het in unaffected son	1.65e-05	4.88	TOLERATED	D		24265693	pubmed 24265693	Retinitis pigmentosa, autosomal recessive;DM;CM1312809;PMID:	MedGen:C3151138,OMIM:613809;Uncertain significance;RCV000191142
14	038-159	RHO	p.(Gly106Arg)	NC_000003.11:g.129247892G>A	NM_000539.3:c.316G>A	HET	isolate	proband	1.653e-05	5.31	DAMAGING	D		1301135	pubmed 1301135	Retinitis pigmentosa;DM;CM920609;PMID:	MedGen:C3151001,OMIM:613731;Pathogenic;RCV000013896
17	043-032	NR2E3	p.(Val118Met)	NC_000015.9:g.72104297G>A	NM_014249.3:c.352G>A	HET	dominant	proband, affected sister	0	4.54	DAMAGING	D		19933183	pubmed 19933183	-	-
18	043-043	PRPF31	p.?	NC_000019.9:g.54626832G>A	NM_015629.3:c.421-1G>A	HET	dominant	proband, 3 affected children	0	3.92	-	-		15162096	pubmed 15162096	Retinitis pigmentosa;DM;CS044091;PMID:	-
23	043-006	RHO	p.(Gly51Arg)	NC_000003.11:g.129247727G>C	NM_000539.3:c.151G>C	HET	isolate	proband	0	5.52	DAMAGING	D		8401533	pubmed 8401533	Retinitis pigmentosa;DM;CM930652;PMID:	MedGen:C3151001,OMIM:613731;Pathogenic;RCV000013922
26	043-016	USH2A	p.(Cys870*)	NC_000001.10:g.216420126G>T	NM_206933.2:c.2610C>A	HET	isolate	proband	1.648e-05	6.03	DAMAGING	NA	3 pred. damaging alleles, 2 prev. reported	22135276	pubmed 22135276	Usher syndrome 2;DM;CM1110197;PMID:	-
26	043-016	USH2A	p.(Asn42Lys)	NC_000001.10:g.216595553G>C	NM_206933.2:c.126C>G	HET	isolate	proband	0	-5.53	DAMAGING	D				-	-
26	043-016	USH2A	p.(Gly2313Cys)	NC_000001.10:g.216143987C>A	NM_206933.2:c.6937G>T	HET	isolate	proband	0.00013208	4.91	DAMAGING	D		26261414	pubmed 26261414	Retinitis pigmentosa;DM;CM158292;PMID:	-
30	043-049	USH2A	p.?	NC_000001.10:g.215987248T>C	NM_206933.2:c.9571-2A>G	HET	isolate	proband	1.683e-05	5.98	-	D				-	-
30	043-049	USH2A	p.?	NC_000001.10:g.216062399G>C	NM_206933.2:c.7595-3C>G	HET	isolate	proband	0	0.994	-	D		17405132	pubmed 17405132	Usher syndrome 2;DM;CS073536;PMID:	MedGen:C1848634,OMIM:276901;Likely pathogenic;RCV000178475
31	043-056	RP2 carrier	p.(Gly163Glu)	NC_000023.10:g.46713296G>A	NM_006915.2:c.488G>A	HET	isolate	proband	0	4.77	TOLERATED	D	MutationTaster:disease causing			-	-
33	043-058	TULP1	p.?	NC_000006.11:g.35466243G>T	NM_003322.3:c.1496-6C>A	HET	isolate	proband	9.383e-05	3.29	-	-		9660588	pubmed 9660588	Retinitis pigmentosa;DM?;CS984713;PMID:	MedGen:CN221809;not provided;RCV000086072
33	043-058	TULP1	p.(Gln163*)	NC_000006.11:g.35478650G>A	NM_003322.3:c.487C>T	HET	isolate	proband	0	3.44	DAMAGING	NA				-	-
37	043-061	USH2A	p.?	NC_000001.10:g.215853720T>C	NM_206933.2:c.12067-2A>G	HET	isolate	proband	6.616e-05	5.26	-	-		18452394	pubmed 18452394	Usher syndrome 2;DM;CS088100;PMID:	MedGen:C3151138,OMIM:613809;MedGen:C1848634,OMIM:276901;Pathogenic;RCV000041712
37	043-061	USH2A	p.(Cys3306Trp)	NC_000001.10:g.215972289A>C	NM_206933.2:c.9918T>G	HET	isolate	proband	0	4.89	DAMAGING	D				-	-
37	043-061	USH2A	p.(Ala1953Gly)	NC_000001.10:g.216243634G>C	NM_206933.2:c.5858C>G	HET	isolate	proband	0.00079404	5.57	DAMAGING	D	VUS - see other 2 alleles	26868535	pubmed 26868535	-	MedGen:CN169374;Uncertain significance;RCV000041872
40	043-067	CNGB1	p.(Arg396Gln)	NC_000016.9:g.57974160C>T	NM_001297.4:c.1187G>A	HET	isolate		0.00011735	-3.66	TOLERATED	B				-	-
40	043-067	CNGB1	p.?	NC_000016.9:g.57954286C>T	NM_001297.4:c.1801+5G>A	HET	isolate		4.141e-05	5.43	-	-	Human splice finder 3.0 (www.umd.be/HSF3/) predicts broken WT donor site			-	-
Solved by exome sequencing
15	043-034	HGSNAT	p.(Ala615Thr)	NC_000008.10:g.43054647G>A	NM_152419.2:c.1843G>A	HET	isolate		0.00439901	5.29	DAMAGING	P		17033958	pubmed 17033958	Mucopolysaccharidosis IIIC;DM;CM065259;PMID	MedGen:C0086649,OMIM:252930,Orphanet:ORPHA79271,SNOMED CT:75238000;MedGen:CN232556,OMIM:616544;MedGen:CN221809;Likely benign;Pathogenic;RCV000190845;RCV000224674;RCV000190844
15	043-034	HGSNAT	p.?	NC_000008.10:g.43048987G>A	NG_009552.1(NM_152419.2):c.1464+1G>A	HET	isolate		8.287e-06	5.12	-	-		17397050	pubmed 17397050	Mucopolysaccharidosis IIIC;DM;CS072215;PMID:	MedGen:CN221809;Pathogenic;RCV000082654
34	038-162	HGSNAT	p.(Ser318Asn)	NC_000008.10:g.43033318G>A	NM_152419.2:c.953G>A	HOM	recessive		0	4.54	DAMAGING	D				-	-
Not solved or partially solved due to variants of uncertain significance (VUS)
3	043-009	ROM1	p.(Leu238Cysfs*78)	NC_000011.9:g.62381847delC	NM_000327.3:c.708delC	HET	isolate		8.239e-05	5.38	-	-	VUS			-	-
3	043-009	COL11A1	p.(Arg762Gln)	NC_000001.10:g.103461555C>T	NM_001854.3:c.2285G>A	HET	isolate		1.673e-05	5.71	TOLERATED	D	likely too common, with homozygotes reported ExAC			-	-
13	231-023	HGSNAT	p.(Ala615Thr)	NC_000008.10:g.43054647G>A	NM_152419.2:c.1843G>A	HOM	isolate		0.00439901	5.29	DAMAGING	P	Common ; uncertain if homozygous state is pathogenic, may need compound het with stronger mutation			Mucopolysaccharidosis IIIC;DM;CM065259;PMID	MedGen:C0086649,OMIM:252930,Orphanet:ORPHA79271,SNOMED CT:75238000;MedGen:CN232556,OMIM:616544;MedGen:CN221809;Likely benign;Pathogenic;RCV000190845;RCV000224674;RCV000190844
16	043-027	USH2A	p.(Leu1378Pro)	NC_000001.10:g.216370013A>G	NM_206933.2:c.4133T>C	HET	recessive	proband, affected brother	0	5.96	DAMAGING	D	Both variants segregated in brother correctly. Variants in cis by NGS reads in proband.	22135276	pubmed 22135276	Usher syndrome 2;DM;CM1110205;PMID:	-
16	043-027	USH2A	p.(Ser1369Leu)	NC_000001.10:g.216370040G>A	NM_206933.2:c.4106C>T	HET	recessive	proband, affected brother	0.00012555	3.1	TOLERATED	B	Seen in a patient with Usher syndrome (see ref to right- Cremers S1#77)	16963483	pubmed 16963483	Usher syndrome 2a;DM;CM071128;PMID:	MedGen:CN169374;Uncertain significance;RCV000041837
20	043-002	TRPM1	p.(Gln1161His)	NC_000015.9:g.31318422C>G	NM_002420.5:c.3483G>C	HET	recessive?		0.00371277	-0.35	DAMAGING	P	reported as likely benign			-	MedGen:CN169374;Likely benign;RCV000154020
20	043-002	TRPM1	p.(Ser157Phe)	NC_000015.9:g.31359348G>A	NM_002420.5:c.470C>T	HET	recessive?		0.00318798	6.11	DAMAGING	D	rare likely damaging variant, but other allele is likely benign			Stationary night blindness, congenital;DM;CM158232;PMID:	MedGen:CN221809;Uncertain significance;RCV000080008
24	043-007	HGSNAT	p.(Ala615Thr)	NC_000008.10:g.43054647G>A	NM_152419.2:c.1843G>A	HOM	isolate		0.00439901	5.29	DAMAGING	P	Common ; uncertain if homozygous state is pathogenic, may need compound het with stronger mutation			Mucopolysaccharidosis IIIC;DM;CM065259;PMID	MedGen:C0086649,OMIM:252930,Orphanet:ORPHA79271,SNOMED CT:75238000;MedGen:CN232556,OMIM:616544;MedGen:CN221809;Likely benign;Pathogenic;RCV000190845;RCV000224674;RCV000190844
25	043-008	MKS1	p.(Thr423Ile)	NC_000017.10:g.56285260G>A	NM_017777.3:c.1268C>T	HOM	isolate		1.685e-05	4.6	TOLERATED	B	mutationtaster.org predicts "disease causing"; subject in 80s with no syndromic features			-	-
29	043-048	BBS9	p.(Pro419Ala)	NC_000007.13:g.33380565C>G	NM_198428.2:c.1255C>G	HET	isolate	proband	9.078e-05	0.378	TOLERATED	B	seen in a macular dytrophy patient; older predictions "damaging"	25910913	pubmed 25910913	-	-
29	043-048	BBS9	p.(Glu753Val)	NC_000007.13:g.33545217A>T	NM_198428.2:c.2258A>T	HET	isolate	proband	0.00076848	5.61	TOLERATED	D				-	-
42	043-069	OPA1	p.(Ala115Val)	NC_000003.11:g.193332823C>T	NM_015560.2: c.344C>T	HET	isolate		0.00025703	5.97	TOLERATED	P	variant OPA1 c.344C>T, p.A115V - probably too common despite literature			Optic atrophy, ataxia & neuropathy;DM;CM101682;PMID:	-
Abbreviations: HET=heterozygous, HOM=homozygous, ExAC AF= Exome Aggregation Consortium allele frequency, gerpRS=Genomic Evolutionary Rate Profiling rejected substitution score, SIFT=Sorting Intolerant From Tolerant score.

## Sheet: Sup T2 burden dom w no sift pph
Gene	# hits in unsolved pericentral cohort (of 16)	#hits in other cohort (of 1728)	Fisher test for enrichment (uncorrected pvalue)	hits in pericentral cohort (sample names)
ADRBK1	7	9	0	BGL038_134:BGL038_162:BGL043_002:BGL043_005:BGL043_008:BGL043_059:BGL043_062
HECA	5	8	0	BGL038_134:BGL038_162:BGL043_002:BGL043_005:BGL043_008
RBM15B	5	12	0	BGL038_162:BGL043_002:BGL043_005:BGL043_008:BGL043_062
CHD3	5	15	0	BGL038_134:BGL038_162:BGL043_002:BGL043_008:BGL043_059
ZNF865	5	16	1e-06	BGL038_162:BGL043_002:BGL043_008:BGL043_059:BGL043_062
CREG2	4	7	2e-06	BGL038_134:BGL038_162:BGL043_002:BGL043_062
TERF2IP	4	13	1e-05	BGL038_134:BGL043_002:BGL043_005:BGL043_059
HS3ST4	3	3	1.2e-05	BGL038_162:BGL043_008:BGL043_059
RPS6KA4	3	3	1.2e-05	BGL043_005:BGL043_059:BGL043_062
UNC45B	3	5	3.5e-05	BGL038_134:BGL043_008:BGL043_062
TCEAL6	3	7	7.3e-05	BGL038_162:BGL043_005:BGL043_059
HSPA9	2	0	7.9e-05	BGL043_008:BGL043_018
MIB2	3	8	0.0001	BGL038_134:BGL038_162:BGL043_002
MYBPC2	4	26	0.000112	BGL038_134:BGL043_008:BGL043_059:BGL043_062
MAP6	4	27	0.000128	BGL038_134:BGL038_162:BGL043_005:BGL043_059
FAM184A	3	9	0.000133	BGL038_162:BGL043_008:BGL043_062
TTC9B	3	9	0.000133	BGL043_002:BGL043_008:BGL043_059
CASKIN2	3	10	0.000172	BGL038_162:BGL043_002:BGL043_062
MAPK1	3	11	0.000217	BGL043_008:BGL043_059:BGL043_062
SRP68	2	1	0.000236	BGL043_002:BGL043_062
KIF7	3	13	0.00033	BGL038_162:BGL043_002:BGL043_059
PAX2	2	2	0.000469	BGL043_002:BGL043_059
WDR81	2	2	0.000469	BGL038_162:BGL043_008
ARID1A	2	3	0.000777	BGL043_002:BGL043_059
BCL6	2	3	0.000777	BGL038_162:BGL043_008
GLDC	2	3	0.000777	BGL043_008:BGL043_059
LRRC55	2	3	0.000777	BGL043-034:BGL043_059
OSBP	2	4	0.001159	BGL038_134:BGL043_002
PRSS12	2	5	0.001614	BGL038_162:BGL043_002
KAT8	2	6	0.002141	BGL043_002:BGL043_005
PHOX2B	2	6	0.002141	BGL038_134:BGL043_002
GBX1	2	7	0.002737	BGL043_002:BGL043_059
MAML1	2	7	0.002737	BGL043_002:BGL043_062
MESP1	2	9	0.004138	BGL043_002:BGL043_059
AOX1	2	10	0.004939	BGL-043-054:BGL043_002
MEX3D	2	10	0.004939	BGL043_002:BGL043_005
FOXD3	2	13	0.007732	BGL038_162:BGL043_002
NIPA1	2	14	0.008789	BGL038_134:BGL043_002
ACO1	1	0	0.009174	BGL-043-015
AQP11	1	0	0.009174	BGL043_002
C4orf45	1	0	0.009174	BGL043-034
CDC25C	1	0	0.009174	BGL043_008
CNKSR2	1	0	0.009174	BGL038_134
COL4A3BP	1	0	0.009174	BGL043-034
CRB2	1	0	0.009174	BGL038_134
CRISP3	1	0	0.009174	BGL-043-015
CRTC2	1	0	0.009174	BGL231-023
CTD-3193O13.9	1	0	0.009174	BGL043_059
CTSD	1	0	0.009174	BGL-043-054
GAP43	1	0	0.009174	BGL038_162
GSK3A	1	0	0.009174	BGL038_162
HDLBP	1	0	0.009174	BGL043_002
INPP5J	1	0	0.009174	BGL043-055
KNDC1	1	0	0.009174	BGL-043-053
KRAS	1	0	0.009174	BGL043_005
LYPD1	1	0	0.009174	BGL043_008
MAP2K4	1	0	0.009174	BGL043_002
NES	1	0	0.009174	BGL043_062
NIPAL4	1	0	0.009174	BGL043-034
NKX2-4	1	0	0.009174	BGL038_134
OR4C16	1	0	0.009174	BGL043_008
OR4D9	1	0	0.009174	BGL043_062
PSMD2	1	0	0.009174	BGL-043-015
RAB32	1	0	0.009174	BGL043_059
SART1	1	0	0.009174	BGL038_162
SLCO1C1	1	0	0.009174	BGL043_018
SMCHD1	1	0	0.009174	BGL038_134
SPPL3	1	0	0.009174	BGL043_002
SPRR3	1	0	0.009174	BGL-043-053
STAT5B	1	0	0.009174	BGL043_008
TTC37	1	0	0.009174	BGL-043-015
TUBB1	1	0	0.009174	BGL043_005
TYRP1	1	0	0.009174	BGL043_008
VTA1	1	0	0.009174	BGL231-023
ZBED6	1	0	0.009174	BGL-043-045
ZDHHC2	1	0	0.009174	BGL043_017
ZNF787	1	0	0.009174	BGL-043-054
ZSWIM4	1	0	0.009174	BGL-043-015
ATXN2	2	15	0.009908	BGL043_005:BGL043_062
RIPK2	2	16	0.011087	BGL043_002:BGL043_062
HES5	2	18	0.013621	BGL043_008:BGL043_062
CHD1	2	20	0.016384	BGL038_134:BGL043_002
AC002365.1	1	1	0.01827	BGL043_017
ACOT2	1	1	0.01827	BGL043_059
ATP2C2	1	1	0.01827	BGL043-034
C2CD4D	1	1	0.01827	BGL-043-015
C9orf172	1	1	0.01827	BGL043_008
CHMP4C	1	1	0.01827	BGL043_062
CPT2	1	1	0.01827	BGL043_002
DAK	1	1	0.01827	BGL043-055
HOXB2	1	1	0.01827	BGL043_005
HRH4	1	1	0.01827	BGL043_018
KCNK7	1	1	0.01827	BGL-043-045
KIAA1211L	1	1	0.01827	BGL038_134
KRT75	1	1	0.01827	BGL-043-054
LRP1	1	1	0.01827	BGL043_008
MYBPH	1	1	0.01827	BGL-043-053
NKX2-3	1	1	0.01827	BGL043_005
NUGGC	1	1	0.01827	BGL043_018
PDHX	1	1	0.01827	BGL043_018
PHOX2A	1	1	0.01827	BGL043_062
RALGAPA1	1	1	0.01827	BGL038_134
SH2B3	1	1	0.01827	BGL038_162
SLC26A6	1	1	0.01827	BGL-043-015
SLC39A2	1	1	0.01827	BGL231-023
SOWAHA	1	1	0.01827	BGL043_008
SZT2	1	1	0.01827	BGL038_162
TAS2R41	1	1	0.01827	BGL038_134
TM9SF3	1	1	0.01827	BGL038_162
TMEM151A	1	1	0.01827	BGL043_059
TNXB	1	1	0.01827	BGL043_017
ZACN	1	1	0.01827	BGL231-023
ZNF280A	1	1	0.01827	BGL043_002
ZSWIM3	1	1	0.01827	BGL231-023
AMIGO1	1	2	0.027287	BGL038_134
BARD1	1	2	0.027287	BGL043_059
BRWD1	1	2	0.027287	BGL043_059
CACNA1F	1	2	0.027287	BGL043_002
CCER1	1	2	0.027287	BGL-043-045
CLEC9A	1	2	0.027287	BGL043_008
ERI3	1	2	0.027287	BGL038_134
HLA-DRB1	1	2	0.027287	BGL038_162
IRAK3	1	2	0.027287	BGL043_017
KRT12	1	2	0.027287	BGL043_008
MCM3	1	2	0.027287	BGL-043-045
NF1	1	2	0.027287	BGL043_008
PCDHGA12	1	2	0.027287	BGL043_017
PINK1	1	2	0.027287	BGL043_008
RBBP9	1	2	0.027287	BGL043_002
TECTA	1	2	0.027287	BGL043_008
TMEM121	1	2	0.027287	BGL043_062
UNC45A	1	2	0.027287	BGL-043-045
ZFP92	1	2	0.027287	BGL043_002
CCDC166	1	3	0.036226	BGL043_005
CCDC172	1	3	0.036226	BGL231-023
COL7A1	1	3	0.036226	BGL043_002
CORO1B	1	3	0.036226	BGL038_162
GPBAR1	1	3	0.036226	BGL043-034
GPR139	1	3	0.036226	BGL038_162
GPR151	1	3	0.036226	BGL231-023
GSG2	1	3	0.036226	BGL043_062
KIAA1919	1	3	0.036226	BGL043_002
LRRC10B	1	3	0.036226	BGL043_059
NUAK1	1	3	0.036226	BGL043_008
OR5H15	1	3	0.036226	BGL-043-015
PCDHGA9	1	3	0.036226	BGL043_002
RNF182	1	3	0.036226	BGL043-034
SLC34A3	1	3	0.036226	BGL038_162
TENM1	1	3	0.036226	BGL038_162
TMEM37	1	3	0.036226	BGL-043-015
UPF3A	1	3	0.036226	BGL038_134
ZDHHC1	1	3	0.036226	BGL043_062
ZFHX3	1	3	0.036226	BGL043_062
ZNF493	1	3	0.036226	BGL-043-054
ZNF701	1	3	0.036226	BGL038_162
BHLHE41	1	4	0.045088	BGL043_008
BPIFA3	1	4	0.045088	BGL043-034
CACNA2D4	1	4	0.045088	BGL-043-015
CCDC158	1	4	0.045088	BGL043_008
CDC42BPG	1	4	0.045088	BGL038_134
FZD1	1	4	0.045088	BGL038_134
GIMAP7	1	4	0.045088	BGL-043-054
LEPRE1	1	4	0.045088	BGL-043-015
NUDT19	1	4	0.045088	BGL043_002
OR2AK2	1	4	0.045088	BGL-043-015
PCDHB4	1	4	0.045088	BGL043_059
PLCD1	1	4	0.045088	BGL043_059
PPT1	1	4	0.045088	BGL038_162
SLC22A24	1	4	0.045088	BGL038_162
THAP7	1	4	0.045088	BGL043_002
ZNF880	1	4	0.045088	BGL043_005
CFTR	1	5	0.053874	BGL-043-053
GPR20	1	5	0.053874	BGL043_002
MX1	1	5	0.053874	BGL038_162
MYO15A	1	5	0.053874	BGL043_059
PGLYRP4	1	5	0.053874	BGL231-023
SIRPG	1	5	0.053874	BGL043_059
STAB2	1	5	0.053874	BGL043_002
TGFBI	1	5	0.053874	BGL038_134
ASB14	1	6	0.062584	BGL043_017
C10orf95	1	6	0.062584	BGL043_005
CTD-3148I10.1	1	6	0.062584	BGL043_018
IL33	1	6	0.062584	BGL043_002
MMP9	1	6	0.062584	BGL-043-045
MTRF1L	1	6	0.062584	BGL043_062
RBM42	1	6	0.062584	BGL038_162
RPUSD4	1	6	0.062584	BGL-043-054
ZBTB10	1	6	0.062584	BGL043_062
CD180	1	7	0.071219	BGL043_059
FMN1	1	7	0.071219	BGL043-055
GDF7	1	7	0.071219	BGL038_134
PLXNC1	1	7	0.071219	BGL038_134
SON	1	7	0.071219	BGL043_062
ST20	1	7	0.071219	BGL043_062
WDR93	1	7	0.071219	BGL043-034
ZNF367	1	7	0.071219	BGL043_002
ATXN3L	1	8	0.079779	BGL043_018
GEN1	1	8	0.079779	BGL-043-015
NSUN6	1	8	0.079779	BGL-043-015
HAVCR1	1	9	0.088265	BGL-043-054
NT5DC3	1	9	0.088265	BGL043_008
PPID	1	9	0.088265	BGL043_005
AC012313.1	1	10	0.096678	BGL043_002
CCDC9	1	10	0.096678	BGL043_059
CLCNKB	1	10	0.096678	BGL043_017
ERMP1	1	10	0.096678	BGL-043-053
LY75-CD302	1	10	0.096678	BGL-043-053
PAX1	1	10	0.096678	BGL043_059
SYN1	1	10	0.096678	BGL043_005
TCEB3C	1	10	0.096678	BGL043_005
DNAH12	1	11	0.105018	BGL038_134
FCER2	1	11	0.105018	BGL043_017
KRTAP4-7	1	11	0.105018	BGL038_162
RP1L1	2	60	0.108448	BGL038_162:BGL043_059
CCDC89	1	12	0.113286	BGL-043-045
MUC6	1	12	0.113286	BGL043_002
PLEKHN1	1	12	0.113286	BGL043_005
SLC6A18	1	12	0.113286	BGL038_162
ZNF254	1	13	0.121482	BGL-043-045
ASPSCR1	1	14	0.129607	BGL043-055
ERAP1	1	14	0.129607	BGL043_017
FAM179A	1	14	0.129607	BGL-043-054
MYH1	1	14	0.129607	BGL043_059
WDR73	1	14	0.129607	BGL043_018
MAMDC4	1	15	0.137662	BGL043_008
ZNF534	1	15	0.137662	BGL-043-054
CACNB2	1	16	0.145646	BGL043_005
ZXDC	1	16	0.145646	BGL043_017
DMXL2	1	17	0.153561	BGL043_005
OBSCN	1	17	0.153561	BGL038_134
RPGR	1	17	0.153561	BGL043_002
ZNF573	1	17	0.153561	BGL043_018
SVOPL	1	19	0.169186	BGL038_162
UNCX	1	19	0.169186	BGL038_134
CTBP2	1	21	0.18454	BGL038_162
GSN	1	21	0.18454	BGL043_002
ZNF844	1	21	0.18454	BGL038_162
WDR87	1	22	0.192117	BGL038_162
RRBP1	1	23	0.199628	BGL231-023
MUC16	1	25	0.214453	BGL043_062
KRT10	1	27	0.229021	BGL038_162
PDE11A	1	29	0.243336	BGL043_059
MUC2	1	41	0.324124	BGL-043-053
MYH15	1	44	0.343017	BGL-043-045

## Sheet: Sup Table 3 burden recessive
Gene	# hits in unsolved pericentral cohort (of 16)	#hits in other cohort (of 1728)	Fisher test for enrichment (uncorrected pvalue)	hits in pericentral cohort (sample names)	Notes
HGSNAT	3	2	6e-06	BGL038_162:BGL043-034:BGL231-023	Additionally, sample ID 043-007 was identified with an HGSNAT VUS
CHD3	2	4	0.001159	BGL038_134:BGL038_162
BCL6	1	0	0.009174	BGL038_162
CGREF1	1	0	0.009174	BGL043_017
FBXL8	1	0	0.009174	BGL043_017
KRT4	1	0	0.009174	BGL043_008
L3MBTL2	1	0	0.009174	BGL038_162
MFSD2B	1	0	0.009174	BGL043_017
MIPEP	1	0	0.009174	BGL231-023
NFIC	1	0	0.009174	BGL-043-053
SHB	1	0	0.009174	BGL043_017
TFRC	1	0	0.009174	BGL043_017
TTC30A	1	0	0.009174	BGL043-034
UBR2	1	0	0.009174	BGL043-055
UNKL	1	0	0.009174	BGL-043-053
FYCO1	2	19	0.014975	BGL043-034:BGL043_062
ARHGEF28	1	1	0.01827	BGL043_017
ATP1B4	1	1	0.01827	BGL-043-015
COL21A1	1	1	0.01827	BGL043_059
DNASE1L3	1	1	0.01827	BGL043-034
MGME1	1	1	0.01827	BGL043_017
PCDH7	1	1	0.01827	BGL038_134
RHBDF2	1	1	0.01827	BGL043_059
SBF1	1	1	0.01827	BGL043_002
TAF1	1	1	0.01827	BGL038_162
TRIM46	1	1	0.01827	BGL-043-045
TUBA8	1	1	0.01827	BGL-043-054
USP11	1	1	0.01827	BGL231-023
ZIC5	1	1	0.01827	BGL-043-053
AKR1C1	1	2	0.027287	BGL043_017
CEP350	1	2	0.027287	BGL-043-045
FAM214B	1	2	0.027287	BGL-043-054
FOXP3	1	2	0.027287	BGL043_005
NCF2	1	2	0.027287	BGL043_017
OR51M1	1	2	0.027287	BGL043_008
PLIN3	1	2	0.027287	BGL-043-054
PNMA3	1	2	0.027287	BGL-043-054
PPP1R12C	1	2	0.027287	BGL038_134
VASN	1	2	0.027287	BGL043_059
ZNF229	1	2	0.027287	BGL-043-054
SYNE2	2	31	0.035315	BGL-043-045:BGL043_005
COL5A1	1	3	0.036226	BGL-043-015
COL6A6	1	3	0.036226	BGL043-034
NFATC3	1	3	0.036226	BGL043_017
PRSS16	1	3	0.036226	BGL-043-045
RIMS2	1	3	0.036226	BGL043-034
SNX27	1	3	0.036226	BGL-043-054
SRPK1	1	3	0.036226	BGL-043-054
XPNPEP2	1	3	0.036226	BGL038_134
C8orf58	1	4	0.045088	BGL043_002
F8	1	4	0.045088	BGL231-023
KLHL34	1	4	0.045088	BGL-043-015
OR2AK2	1	4	0.045088	BGL-043-015
UBA1	1	4	0.045088	BGL043_005
AXDND1	1	5	0.053874	BGL043_017
LRP1	1	5	0.053874	BGL-043-053
PNCK	1	5	0.053874	BGL043_002
TSC1	1	5	0.053874	BGL043_017
CCDC22	1	6	0.062584	BGL043_008
CCDC66	1	6	0.062584	BGL043_017
CENPE	1	6	0.062584	BGL043_017
DHRS12	1	6	0.062584	BGL-043-015
IL12RB2	1	6	0.062584	BGL043-034
LAIR1	1	6	0.062584	BGL-043-054
PRG4	1	6	0.062584	BGL043_017
TREX2	1	6	0.062584	BGL231-023
TTC7A	1	6	0.062584	BGL043_002
MAMDC4	1	7	0.071219	BGL043_008
NUDT19	1	8	0.079779	BGL-043-015
RPS3	1	8	0.079779	BGL038_162
ATP11C	1	9	0.088265	BGL043_005
PLXNB3	1	9	0.088265	BGL043_005
TRO	1	9	0.088265	BGL043-055
NHS	1	10	0.096678	BGL043_062
TECPR2	1	11	0.105018	BGL043_008
ZNF74	1	11	0.105018	BGL043_017
HLA-DQA1	1	12	0.113286	BGL-043-015
SLX4	1	12	0.113286	BGL043-034
RPGR	1	13	0.121482	BGL043_002
AMER1	1	14	0.129607	BGL-043-015
ARVCF	1	14	0.129607	BGL231-023
COL27A1	1	14	0.129607	BGL-043-015
HELZ2	1	14	0.129607	BGL043_059
INADL	1	14	0.129607	BGL043_018
STARD8	1	14	0.129607	BGL-043-015
RIPK2	1	15	0.137662	BGL043_002
ZDHHC19	1	16	0.145646	BGL038_134
OR4N2	1	17	0.153561	BGL-043-015
TENM1	1	17	0.153561	BGL038_162
TCP11	1	18	0.161408	BGL-043-045
BRCA2	1	19	0.169186	BGL043-055
CCDC40	1	23	0.199628	BGL231-023
CRIPAK	1	27	0.229021	BGL-043-015
SHROOM2	1	31	0.257401	BGL043_005
DNAH3	1	32	0.264341	BGL043_008
DCHS2	1	38	0.304722	BGL-043-053
LAMA5	1	40	0.317713	BGL038_162
GPR98	1	48	0.367439	BGL043_059
OBSCN	1	87	0.564865	BGL231-023
AHNAK2	1	123	0.694371	BGL-043-015
